# Supplementary material for: Damped circadian oscillation in the absence of KaiA in Synechococcus
Source: PubMed Central journal article supplement (PMC7205874; doi:10.1038/s41467-020-16087-x), 2020-05-07
Supplement: 41467_2020_16087_MOESM1_ESM.pdf [file 41467_2020_16087_MOESM1_ESM.pdf]

**Damped circadian oscillation in the absence of KaiA in *Synechococcus***

Kawamoto *et al.*

Supplementary Information

## Supplementary Information

| Strain name        | Genotype                                                                                                     | Host strain | Plasmid        | References |
|--------------------|--------------------------------------------------------------------------------------------------------------|-------------|----------------|------------|
| ILC976<br>(NUC 42) | $P_{kaiBC}::luxA$ , Cm <sup>R</sup>                                                                          | -           | -              | 1          |
| ILC128<br>(NUC 43) | $\Delta kaiABC$ ; $P_{kaiBC}::luxAB$ , Km <sup>R</sup> , Cm <sup>R</sup>                                     | ILC976      | pDkaiABC       | 1          |
| ILC1018            | $\Delta kaiABC$ ; $P_{kaiBC}::luxAB$ , Sp <sup>R</sup> , Cm <sup>R</sup>                                     | ILC976      | pIL764         | This work  |
| ILC653             | $\Delta kaiBC$ ; $P_{kaiBC}::luxAB$ , Sp <sup>R</sup> , Cm <sup>R</sup>                                      | ILC976      | No name        | 3          |
| ILC568             | $kaiA$ ; $P_{kaiBC}::luxAB$ , Sp <sup>R</sup> , Cm <sup>R</sup>                                              | ILC128      | pIL1047        | 2          |
| ILC770             | $kaiA$ (double nonsense); $P_{kaiBC}::luxAB$ , Sp <sup>R</sup> , Cm <sup>R</sup>                             | ILC128      | pIL813         | This work  |
| ILC767             | $kaiA$ ; $kaiB$ ; $P_{kaiBC}::luxAB$ , Sp <sup>R</sup> , Cm <sup>R</sup>                                     | ILC128      | pIL810         | This work  |
| ILC662             | $kaiA$ ; $\Delta kaiC$ ; $P_{kaiBC}::luxAB$ , Km <sup>R</sup> , Cm <sup>R</sup>                              | ILC568      | pDkaiC         | 2          |
| ILC661             | $kaiA$ ; $\Delta sasA$ ; $P_{kaiBC}::luxAB$ , Sp <sup>R</sup> , Km <sup>R</sup> , Cm <sup>R</sup>            | ILC568      | pDsaskm        | 4          |
| ILC680             | $kaiA$ ; $cikA$ ; $P_{kaiBC}::luxAB$ , Sp <sup>R</sup> , Gm <sup>R</sup> , Cm <sup>R</sup>                   | ILC568      | pAM2152        | 5          |
| ILC1039            | $kaiA$ ; $labA$ ; $P_{kaiBC}::luxAB$ , Sp <sup>R</sup> , Km <sup>R</sup> , Cm <sup>R</sup>                   | ILC568      | pDlabA(Km)     | 6          |
| ILC1468            | $\Delta kaiBC$ ; $P_{tre}::kaiBC$ ; $P_{kaiBC}::luxAB$ , Sp <sup>R</sup> , Km <sup>R</sup> , Cm <sup>R</sup> | ILC653      | pNS2Ptrc-kaiBC | 7          |
| ILC1069            | $\Delta kaiA$ ; $P_{tre}::kaiBC$ ; $P_{kaiBC}::luxAB$ , Sp <sup>R</sup> , Km <sup>R</sup> , Cm <sup>R</sup>  | ILC1018     | pNS2Ptrc-kaiBC | 7          |
| ILC1465            | $\Delta kaiA$ ; $P_{0050}::kaiBC$ ; $P_{kaiBC}::luxAB$ , Sp <sup>R</sup> , Em <sup>R</sup> , Cm <sup>R</sup> | ILC1018     | pIL958         | This work  |
| ILC1019            | $\Delta kaiA$ ; $D4::kaiBC$ ; $P_{kaiBC}::luxAB$ , Sp <sup>R</sup> , Km <sup>R</sup> , Cm <sup>R</sup>       | ILC1018     | No name        | 8          |
| ILC541             | $kaiA$ ; $kaiC^{EE}$ ; $P_{kaiBC}::luxAB$ , Sp <sup>R</sup> , Km <sup>R</sup>                                | ILC128      | pIL698         | This work  |
| ILC785             | $kaiA$ ; $kaiC^{AA}$ ; $P_{kaiBC}::luxAB$ , Sp <sup>R</sup> , Km <sup>R</sup>                                | ILC128      | pIL851         | This work  |
| ILC778             | $kaiA$ ; $kaiC^{A87V}$ ; $P_{kaiBC}::luxAB$ , Sp <sup>R</sup> , Km <sup>R</sup>                              | ILC128      | pIL840         | This work  |
| ILC766             | $kaiA$ ; $kaiC^{S157P}$ ; $P_{kaiBC}::luxAB$ , Sp <sup>R</sup> , Km <sup>R</sup>                             | ILC128      | pIL777         | This work  |
| ILC776             | $kaiA$ ; $kaiC^{R321Q}$ ; $P_{kaiBC}::luxAB$ , Sp <sup>R</sup> , Km <sup>R</sup>                             | ILC128      | pIL838         | This work  |
| ILC765             | $kaiA$ ; $kaiC^{R393C}$ ; $P_{kaiBC}::luxAB$ , Sp <sup>R</sup> , Km <sup>R</sup>                             | ILC128      | pIL776         | This work  |
| ILC777             | $kaiA$ ; $kaiC^{F470Y}$ ; $P_{kaiBC}::luxAB$ , Sp <sup>R</sup> , Km <sup>R</sup>                             | ILC128      | pIL839         | This work  |

**Supplementary Table 1. Strains used in this study.**

| <b>Genotype</b>                              | <b>Fitted period (h)</b> | <b>Autocorrelation (h)</b> | <b>Peak-to-peak (h)</b> | <b>Damping rate <math>\times 10^{-2}(\text{1/h})</math></b> |
|----------------------------------------------|--------------------------|----------------------------|-------------------------|-------------------------------------------------------------|
| WT (25°C)                                    | 25.1±0.26                | 25.0±0.33                  | 25.9±1.50               | 0.154±0.097                                                 |
| WT (27°C)                                    | 25.3±0.10                | 25.3±0.00                  | 25.1±0.48               | 0.031±0.018                                                 |
| WT (30°C)                                    | 25.1±0.18                | 25.1±0.19                  | 25.1±0.42               | 0.052±0.030                                                 |
| WT (32°C)                                    | 25.2±0.04                | 25.3±0.00                  | 25.5±0.32               | 0.093±0.023                                                 |
| <i>kaiC<sup>A87V</sup></i>                   | 22.4                     | 22.3                       | 22.0                    | 0.055                                                       |
| <i>kaiC<sup>S157P</sup></i>                  | 22.3                     | 22.3                       | 21.0                    | 0.0                                                         |
| <i>kaiC<sup>R321Q</sup></i>                  | 23.8                     | 23.7                       | 21.0                    | 1.186                                                       |
| <i>kaiC<sup>R393C</sup></i>                  | 15.1                     | 15.0                       | 15.0                    | 0.106                                                       |
| <i>kaiC<sup>F470Y</sup></i>                  | 16.7                     | 16.7                       | 17.0                    | 0.005                                                       |
| <i>kaiC<sup>EE</sup></i>                     | 43.8±0.72                | 44.0±1.41                  | 40±1.89                 | 1.583±0.880                                                 |
| <i>kaiA<sup>-</sup></i> (25°C)               | 27.3±1.24                | 27.7±1.69                  | 30.2±1.44               | 7.150±0.820                                                 |
| <i>kaiA<sup>-</sup></i> (27°C)               | 27.3±0.74                | 26.3±0.67                  | 27.0±1.03               | 4.482±0.341                                                 |
| <i>kaiA<sup>-</sup></i> (30°C)               | 25.8±1.31                | 24.8±1.29                  | 24.0±1.51               | 5.732±0.844                                                 |
| <i>kaiA<sup>-</sup></i> (32°C)               | 26.9±0.88                | 25.1±0.83                  | 25.0±0.66               | 7.787±0.386                                                 |
| <i>kaiA<sup>-</sup>;kaiC<sup>A87V</sup></i>  | 25.1±0.63                | 24.6±0.51                  | 25.2±0.16               | 4.558±0.275                                                 |
| <i>kaiA<sup>-</sup>;kaiC<sup>S157P</sup></i> | 22.1±0.57                | 20.7±0.58                  | 21.4±0.34               | 8.346±0.371                                                 |
| <i>kaiA<sup>-</sup>;kaiC<sup>R321Q</sup></i> | 30.6±1.01                | 29.4±0.69                  | 28.1±1.96               | 2.749±0.632                                                 |
| <i>kaiA<sup>-</sup>;kaiC<sup>R393C</sup></i> | 25.5±0.70                | 24.6±0.69                  | 24.8±0.57               | 5.470±0.125                                                 |
| <i>kaiA<sup>-</sup>;kaiC<sup>F470Y</sup></i> | 26.3±1.08                | 25.4±0.69                  | 25.7±0.269              | 6.865±0.496                                                 |
| <i>kaiA<sup>-</sup>;kaiC<sup>EE</sup></i>    | 24.7±0.60                | 21.9±0.38                  | 21.2±1.112              | 9.052±0.360                                                 |

**Supplementary Table 2. Periods estimated by three methods and damping rates.**

## Supplementary Figure 1

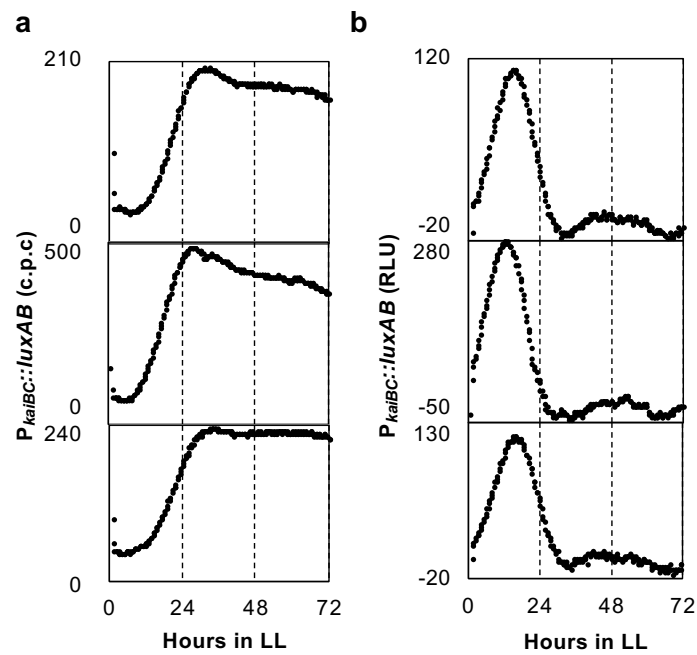

**Supplementary Figure 1.** (a) Three replicated bioluminescence profiles in the *kaiA*<sup>-</sup> strain under continuous low light conditions ( $\sim 15 \mu\text{mol photon}\cdot\text{m}^{-2}\cdot\text{s}^{-1}$ ) after entrainment to two light-dark cycles. (b) Detrended profiles of (a). Because the second peaks were not observed reproducibly, period lengths were not calculated.

## Supplementary Figure 2

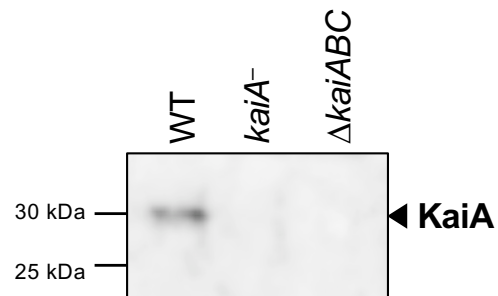

**Supplementary Figure 2.** Western blotting analysis using anti-KaiA antiserum for the wild-type (WT), *kaiA*<sup>-</sup> and  $\Delta$ *kaiABC* strains used in the present study. One of two independent studies is shown. In both experiments, signal for KaiA was exclusively detected in WT.

### Supplementary Figure 3

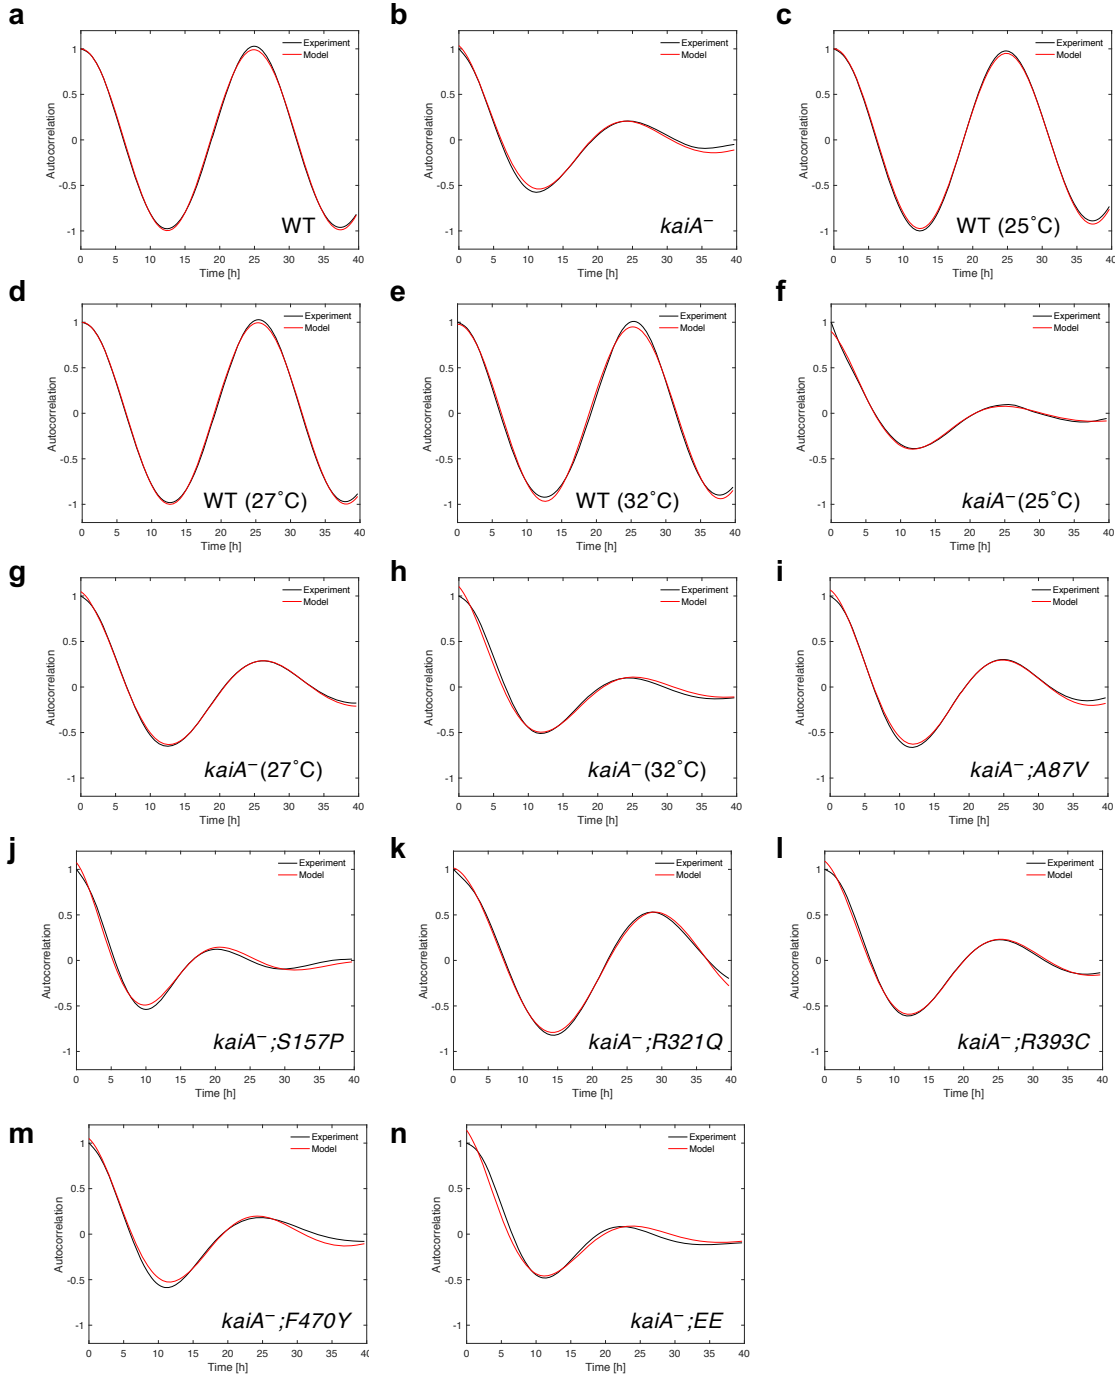

**Supplementary Figure 3.** Fitting the auto-correlation function for experimental data. **(a)** WT at 30° C (standard condition), **(b)** *kaiA*<sup>-</sup> at 30° C (standard condition), **(c)** WT at 25° C, **(d)** WT at 27° C, **(e)** WT at 32° C, **(f)** *kaiA*<sup>-</sup> at 25° C, **(g)** *kaiA*<sup>-</sup> at 27° C, **(h)** *kaiA*<sup>-</sup> at 32° C, **(i)** *kaiA*<sup>-</sup>;A87V at 30° C, **(j)** *kaiA*<sup>-</sup>;kaiC<sup>S157P</sup> at 30° C, **(k)** *kaiA*<sup>-</sup>;kaiC<sup>R321Q</sup> at 30° C, **(l)** *kaiA*<sup>-</sup>;kaiC<sup>R393C</sup> at 30° C, **(m)** *kaiA*<sup>-</sup>;kaiC<sup>F470Y</sup> at 30° C, and **(n)** *kaiA*<sup>-</sup>;kaiC<sup>EE</sup> at 30° C.

### Supplementary Figure 4

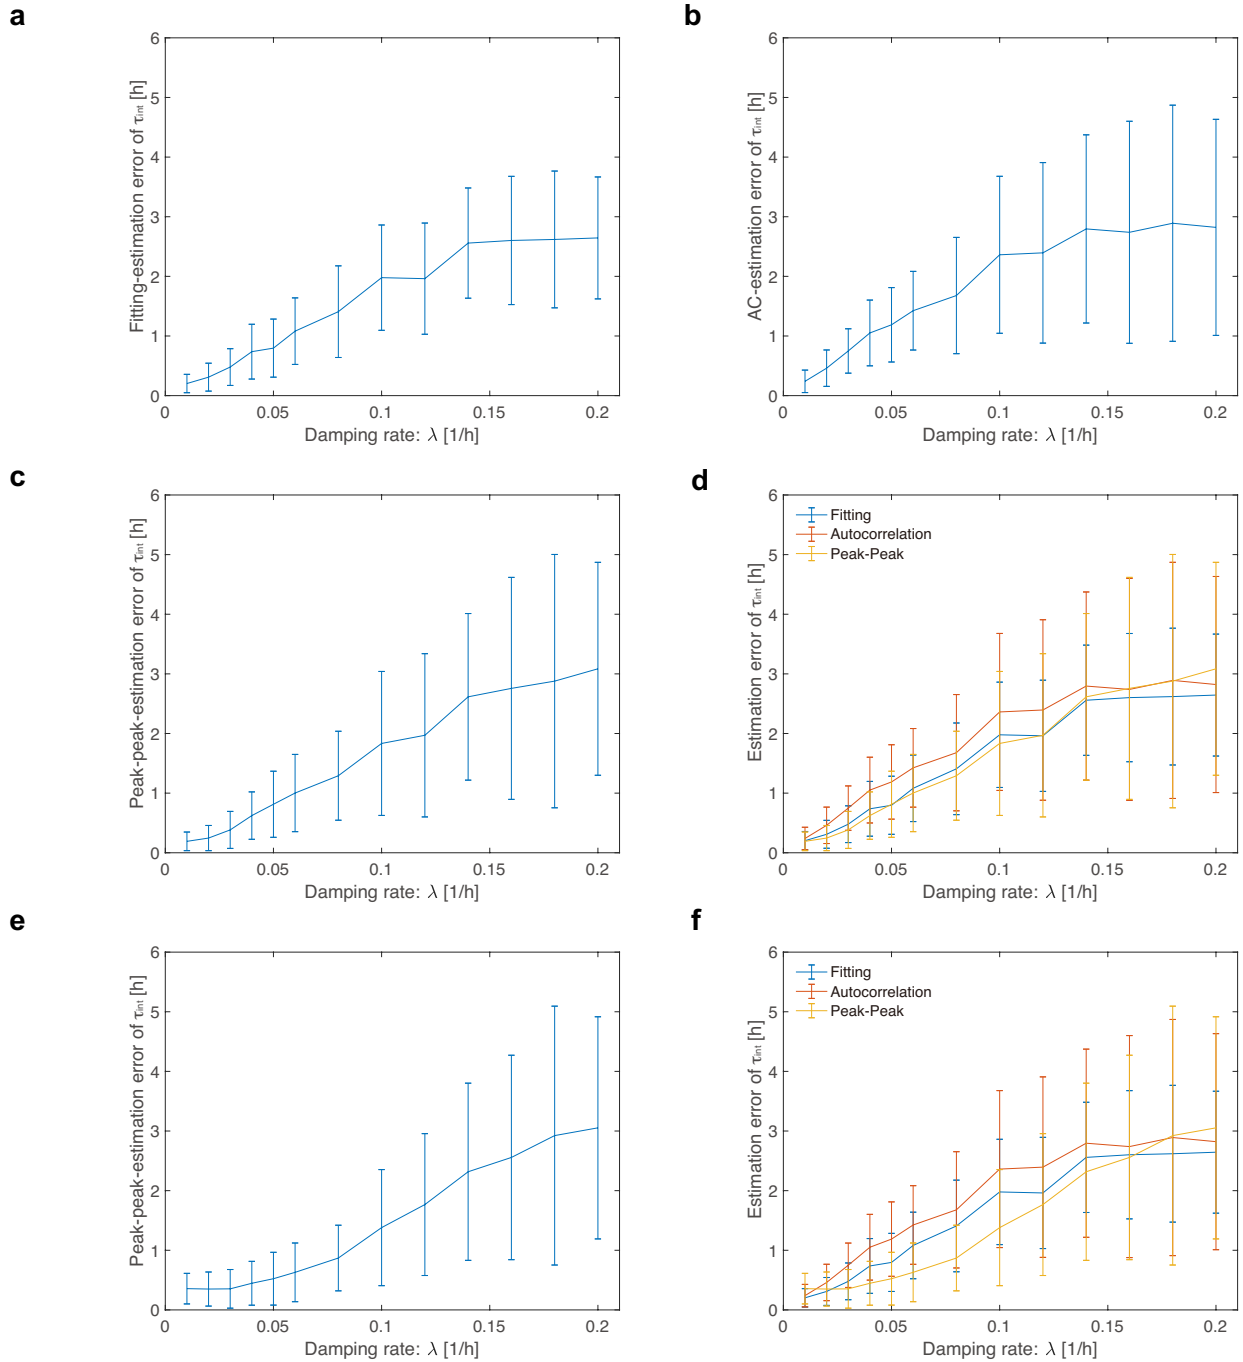

**Supplementary Figure 4.** Dependence of the estimation error of period  $t_{int}$  on the damping rate  $\lambda$  (average and standard deviation of 100 trials). (a) Estimated by the method of Westermarck *et al.* (supporting reference 5). (b) Estimated by the peak of the autocorrelation function. (c) Estimated by the initial two peak-to-peak intervals (average of the first and second peak-to-peak intervals). (d) Comparison of (a), (b) and (c). (e) Estimated by the first peak-to-peak intervals. (f) Comparison of (a), (b) and (e).

## Supplementary Figure 5

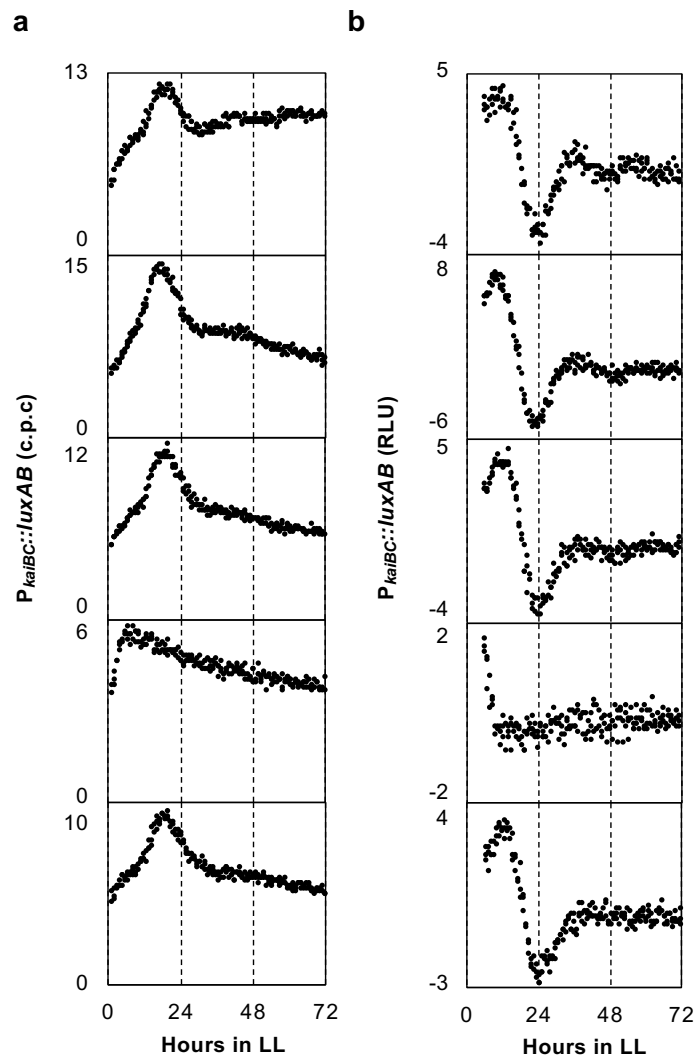

**Supplementary Figure 5.** Instability of the damped oscillation of *kaiA* at 35° C. (a) Five replicated bioluminescence profiles in the *kaiA*<sup>-</sup> strain under continuous light at 35° C. (b) Detrended profiles of (a). Because the second peaks were not observed reproducibly, period lengths were not calculated.



## Supplementary Figure 6

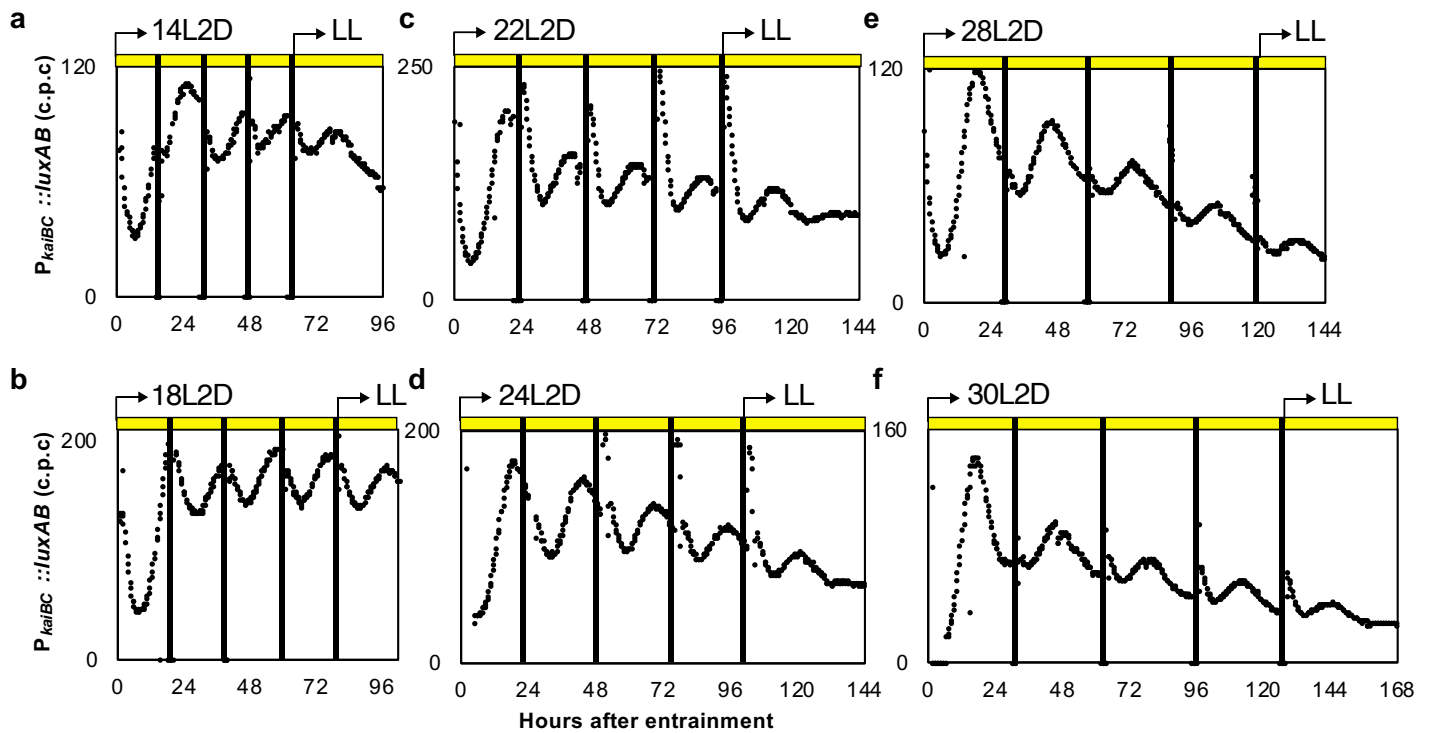

**Supplementary Figure 6.** Bioluminescence profiles in the *kaiA*<sup>-</sup> strain were resonated with 2-h dark pulses with a period ranging from 16 to 32 h. After two 12-h:12-h light-dark (LD) cycles, bioluminescence was monitored while 2-h dark pulses were given four times repeatedly over a period of 16 (a), 20 (b), 24 (c), 26 (d), 30 (e) or 32 h (f). Black and bars indicate the durations of dark and light exposure, respectively.

## Supplementary Figure 7

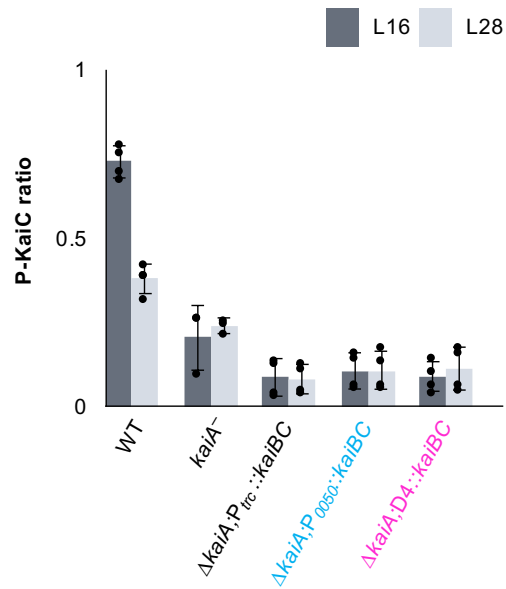

**Supplementary Figure 7.** The P-KaiC/total KaiC ratio was quantified via densitometric analysis of Western blotting data in the wild-type (WT) and *kaiA*-null strains ( $n = 4$  or 3, representative western data are shown in Fig. 4g). Black and gray bars represent the mean values at hour 16 and 28 in the light, respectively. Dot plots represent density of individual bands, and error bars indicate s.d.

## Supplementary Figure 8

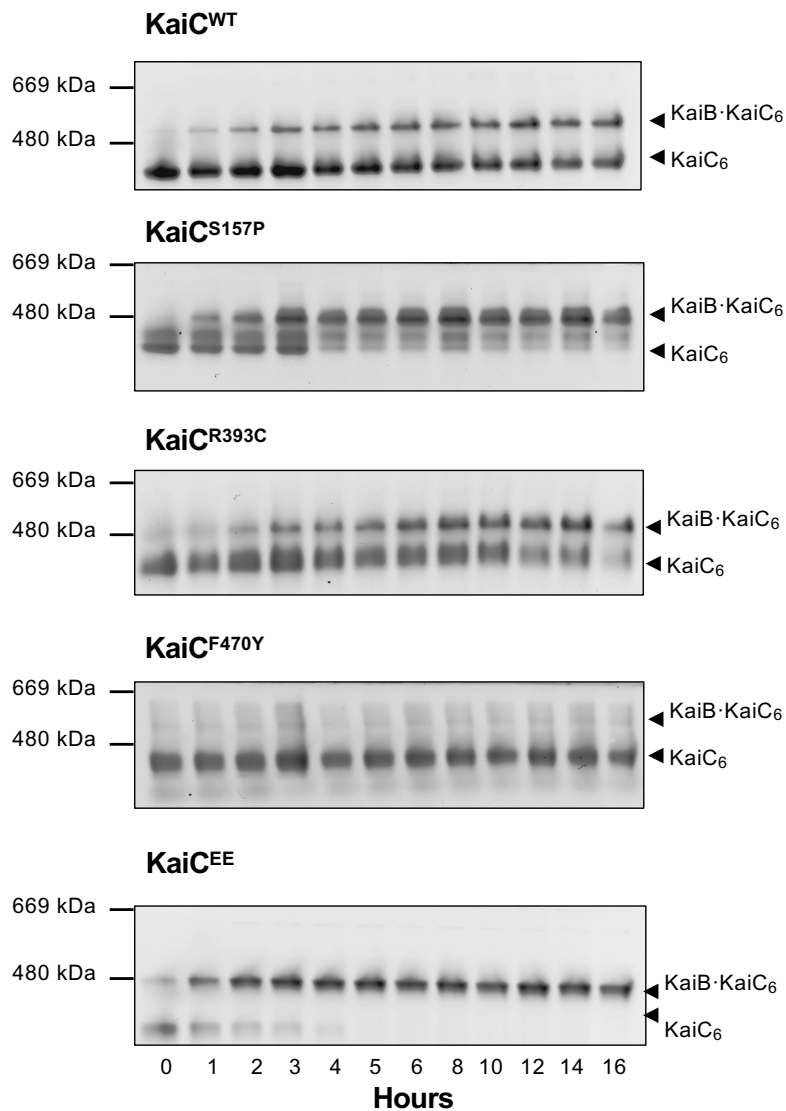

**Supplementary Figure 8.** Dynamics of KaiB-KaiC complex formation as analyzed via Native PAGE. Recombinant KaiB and the wild-type (WT) or mutant KaiC proteins were mixed at hour 0 and incubated at 30° C ( $n = 2$ ). For details, see Materials and Methods. Upper and lower bands represent KaiB-KaiC and KaiC complexes, respectively. KaiC<sub>6</sub> refers to the KaiC hexamer.

## Supplementary Figure 9

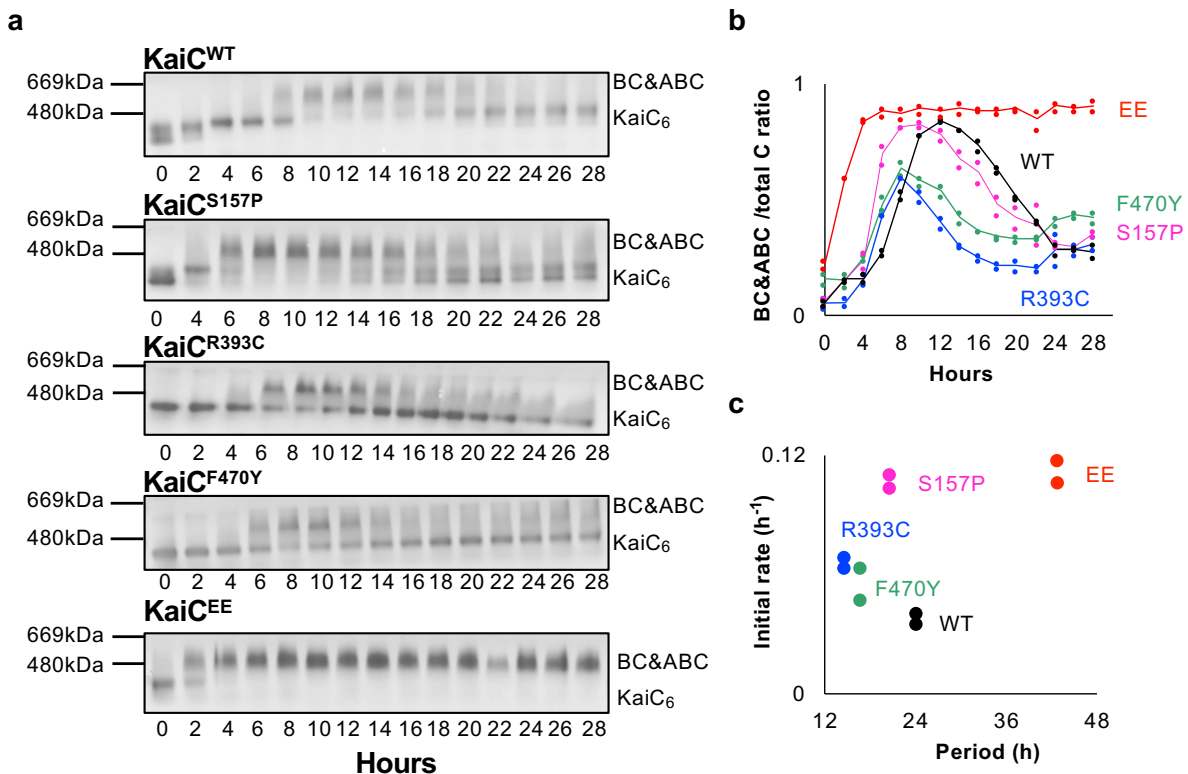

**Supplementary Figure 9.** KaiA-KaiB-KaiC complex formation analysed via Native PAGE. **(a)** Dynamics of KaiA-KaiB-KaiC complex formation as analyzed via Native PAGE. Recombinant KaiA, KaiB and the wild-type (WT) or mutant KaiC proteins were mixed at hour 0 and incubated at 30° C. The upper bands contain both KaiBC and KaiABC complexes, whereas the lower bands represent the KaiC hexamer. Representative data of duplicated experiments are shown. **(b)** Densitometric analysis of the Native PAGE gels ( $n = 2$ ). Dot plots indicate each experimental value, and the curved lines indicate mean values. **(c)** The calculated KaiB-KaiC or KaiA-KaiB-KaiC complex formation rates between hour 0 and 6 are plotted against the period lengths of the intact (KaiABC-containing) sustained oscillator with each indicated *kaiC* mutation.

Supplementary Figure 10

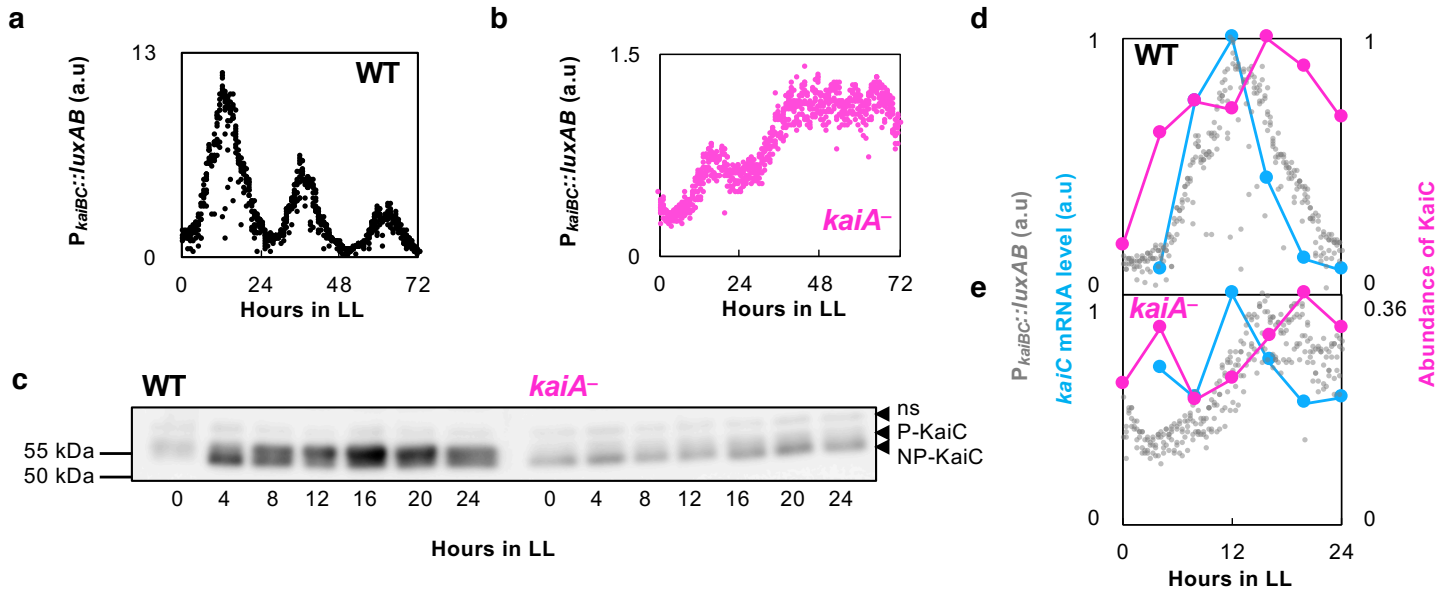

**Supplementary Figure 10.** Profiles of bioluminescences, *kaiBC* mRNAs and KaiC in WT and *kaiA*<sup>-</sup> in LL. (a) Bioluminescence profiles of the wild type and (b) *kaiA*<sup>-</sup> strains in continuous liquid culture used for sampling. (c) Western profiles for KaiC. (d, e) Combined data of bioluminescence (promoter activity, gray), *kaiBC* mRNA by qPCR (cyan), and KaiC protein level (magenta) in WT (d) and (e) *kaiA*<sup>-</sup> ( $n = 1$ ).

### Supplementary References

1. Nishimura, H., et al., Mutations in KaiA, a clock protein, extend the period of circadian rhythm in the cyanobacterium *Synechococcus elongatus* PCC 7942. *Microbiology* **148**, 2903-2909 (2002).
2. Ishiura, M., et al., Expression of a gene cluster *kaiABC* as a circadian feedback process in cyanobacteria. *Science* **281**, 1519-1523 (1998).
3. Nakahira, Y., et al., Global gene repression by KaiC as a master process of prokaryotic circadian system. *Proc Natl Acad Sci U S A* **101**, 881-885 (2004).
4. Iwasaki, H., et al., A KaiC-interacting sensory histidine kinase, SasA, necessary to sustain robust circadian oscillation in cyanobacteria. *Cell* **101**, 223-233 (2000).
5. Schmitz, O., Katayama, M., Williams, S. B., Kondo, T., Golden, S. S. CikA, a bacteriophytochrome that resets the cyanobacterial circadian clock. *Science* **289**, 765-768 (2000).
6. Taniguchi, Y., et al., *labA*: a novel gene required for negative feedback regulation of the cyanobacterial circadian clock protein KaiC. *Genes Dev* **21**, 60-70 (2007).
7. Murayama, Y., Oyama, T., & Kondo, T. Regulation of circadian clock gene expression by phosphorylation states of KaiC in cyanobacteria. *J Bacteriol* **190**, 1691-1698 (2008).
8. Kutsuna, S., Nakahira, Y., Katayama, M., Ishiura, M., Kondo, T. Transcriptional regulation of the circadian clock operon *kaiBC* by upstream regions in cyanobacteria. *Mol Microbiol* **57**, 1474-1484 (2005).
